# Supplementary material for: Determination of Long-Term Soil Apparent Thermal Diffusivity Using Near-Surface Soil Temperature on the Tibetan Plateau
Source: MDPI journal article supplement (doi:10.3390/rs14174238), 2022-08-28
Supplement: s1 [file s1]

## **Supplementary Materials**

### **Determination of long-term soil apparent thermal diffusivity using near-surface soil temperature on the Tibetan Plateau**

Bing Tong<sup>1</sup>, Hui Xu<sup>1</sup>, Robert Horton<sup>2</sup>, Lingen Bian<sup>3</sup>, Jianping Guo<sup>\*1</sup>

<sup>1</sup> State Key Laboratory of Severe Weather, Chinese Academy of Meteorological Sciences,  
Beijing, China

<sup>2</sup> Agronomy Department, Iowa State University, Ames, Iowa

<sup>3</sup> Chinese Academy of Meteorological Sciences, Beijing, China

\*Corresponding author: Jianping Guo ([jpguo@cma.gov.cn](mailto:jpguo@cma.gov.cn))

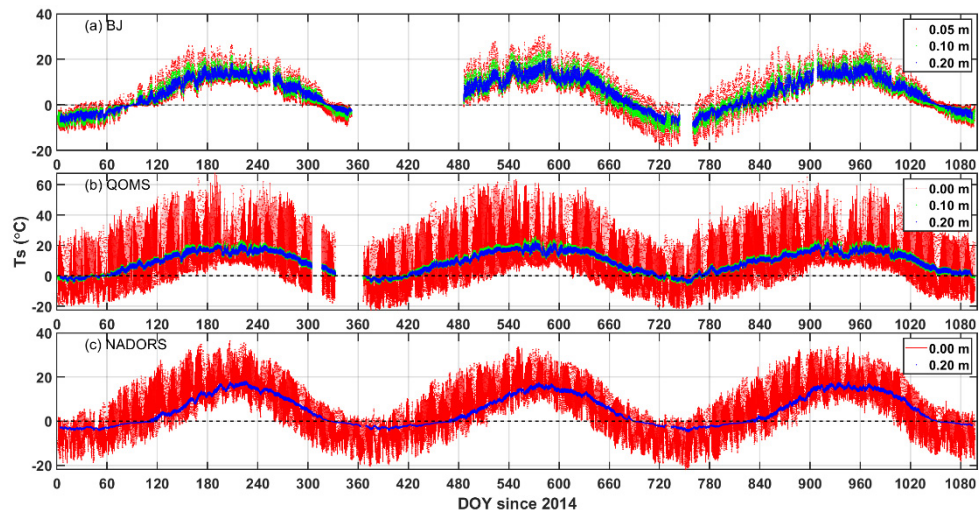

**Figure S1.** The variations of soil temperature at (a) BJ, (b) QOMS, (c) NADORS, respectively.

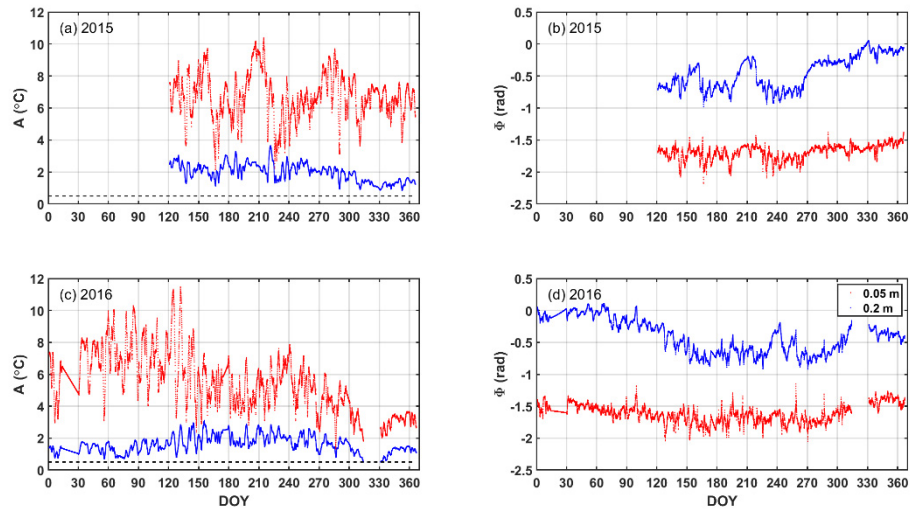

**Figure. S2.** The amplitude ( $A$ ,  $^{\circ}\text{C}$ ) and phase ( $\Phi$ , rad) of soil temperature 2015-2016 at BJ.

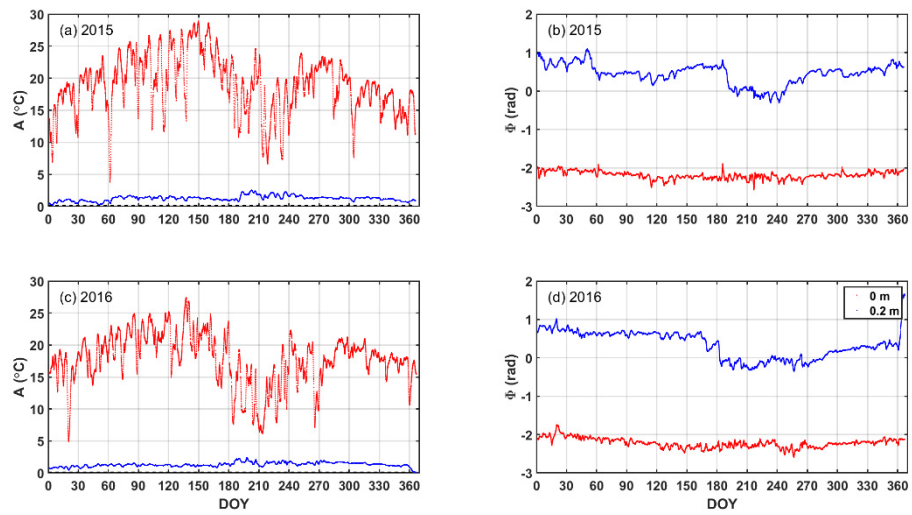

**Figure. S3.** The amplitude ( $A$ , °C) and phase ( $\Phi$ , rad) of soil temperature 2015-2016 at QOMS.

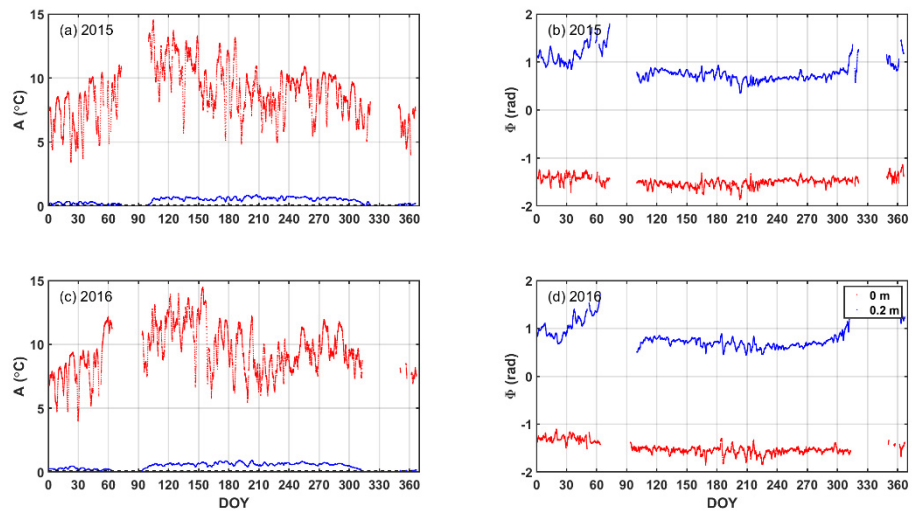

**Figure. S4.** The amplitude ( $A$ , °C) and phase ( $\Phi$ , rad) of soil temperature 2015-2016 at NADORS.

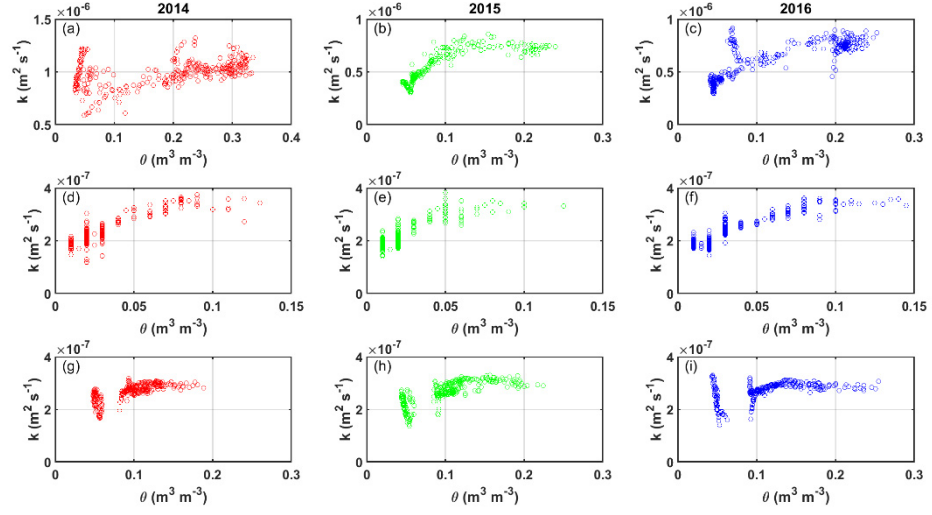

**Figure. S5.** The variation of soil apparent thermal diffusivity ( $k$ ,  $\text{m}^2 \text{s}^{-1}$ ) with soil moisture ( $\theta$ ,  $\text{m}^3 \text{m}^{-3}$ ) on a daily timescale in 2014 (in the 1<sup>st</sup> column), 2015 (in the 2<sup>nd</sup> column) and 2016 (in the 3<sup>rd</sup> column) at (a-c) BJ, (d-f) QOMS, and (g-i) NADORS, respectively.
